# Supplementary material for: Diagnostic and Therapeutic Gaps in Recurrent Stroke Management: Real-World Insights from a Ghanaian Hospital-based Registry.
Source: Research Square preprint supplement (doi:10.21203/rs.3.rs-8489763/v1), 2026-01-23
Supplement: Supplementary file 1 [file 2531d28977fc00292563b9eb.docx]

**Supplementary Tables S1 Extent of risk and etiological evaluation done for recurrent ischemic stroke patients (by subtype)**

| **Diagnostic evaluation n(%)** | **All Ischemic recurrent strokes**  **n=230** | **Non-Lacunar n=128** | **Lacunar**  **n= 102** | **p-value** |
| --- | --- | --- | --- | --- |
| Lipid Profile | 218 (94.78) | 123 (96.09) | 95 (93.14) | 0.418 |
| Hemoglobin A1c | 159 (69.13) | 98 (76.56) | 61 (59.8) | 0.013* |
| Renal Function | 226 (98.26) | 126 (98.44) | 100 (98.04) | 1.000 |
| HIV screening | 5 (2.17) | 3 (2.34) | 2 (1.96) | 1.000 |
| FBC | 229 (99.57) | 127 (99.22) | 102 (100) | 1.000 |
| Sickle Cell screening | 4 (1.74) | 4 (3.13) | 0 (0) | 0.124 |
| Clotting profile | 0 (0) | 0 (0) | 0 (0) | NA |
| 12-Lead ECG | 43 (18.70) | 37 (28.91) | 6 (5.88) | 0.000* |
| 24- 72-hour Holter ECG | 0 (0) | 0 (0) | 0 (0) | NA |
| TTE Echo | 22 (9.57) | 21 (16.4) | 1 (0.98) | 0.000* |
| Carotid Doppler | 18 (7.83) | 18 (14.06) | 0 (0) | 0.000* |
| CTA/MRA | 2 (0.87) | 2 (1.56) | 0 (0) | 0.505 |
| DSA | 0 (0) | 0 (0) | 0 (0) | NA |
| GRE/SWI MRI | 0 (0) | 0 (0) | 0 (0) | NA |
| TEE Echo | 0 (0) | 0 (0) | 0 (0) | NA |
| Implantable loop recorder | 0 (0) | 0 (0) | 0 (0) | NA |
| APS panel | 1 (0.43) | 1 (0.78) | 0 (0) | 1.000 |

**Supplementary Tables S2 Etiological designation**

| **Etiological designation for Recurrent ischemic strokes**  **n (%)** | **Lacunar**  **n= 102** | **Non-Lacunar**  **n=128** |
| --- | --- | --- |
| Large Vessel Atherosclerosis | 0 (0) | 113 (88.28) |
| Small vessel disease | 101(99.02) | 0 (0) |
| Cardioembolic | 0 (0) | 15 (11.22) |
| Other Determined Etiologies |  |  |
| Dissection | 1 ( 0.98) | 0 (0) |
| Others | 0 (0) | 0 (0) |
| **Etiological designation for Recurrent hemorrhagic strokes** | **Non-Lobar**  **n= 51** | **Lobar**  **n=12** |
| Systemic Diseases | 0 (0) | 0 (0) |
| Medication | 0 (0) | 0 (0) |
| Amyloid Angiopathy | 0 (0) | 10 (83.33) |
| Structural Disease |  |  |
| AV malformation | 0 (0) | 0 (0) |
| Aneurysm | 0 (0) | 1 (8.33) |
| Intracranial Tumor | 0 (0) | 1 (8.33) |
| Hypertension | 51 (100) | 0 (0) |

**Supplementary Table 3** **Secondary prevention medications received by patients prior to the onset of recurrent stroke stratefied by index stroke type**

| **Medications n (%)** | **All recurrent strokes**  **n= 302** | **Index Ischemic strokes**  **n=**214 | **Index Hemorrhagic**  **strokes**  **n=**61 | **Unknown Index stroke type**  **n=**27 | **P-value** |
| --- | --- | --- | --- | --- | --- |
| **Medications** |  |  |  |  |  |
| CCB | 168 (55.6) | 128 (59.8) | 31 (50.8) | 9 (33.3) | 0.046* |
| ARB | 49 (16.2) | 37 (17.3) | 12 (19.7) | 0 (0) | 0.115 |
| ACEI | 8 (2.6) | 6 (2.8) | 2 (3.3) | 0 (0) | 0.838 |
| Thiazide | 17 (5.6) | 15 (7.0) | 1 (1.6) | 1 (3.7) | 0.422 |
| Beta Blocker | 9 (3.0) | 7 (3.3) | 1 (1.6) | 1 (3.7) | 0.910 |
| Alpha adrenergic receptor | 0 (0) | 0 (0) | 0 (0) | 0 (0) | NA |
| Methyl dopa | 5 (1.7) | 4 (1.8) | 1 (1.6) | 0(0) | 0.916 |
| Anticoagulant | 7 (2.3) | 7 (3.3) | 0 (0) | 0 (0) | 0.938 |
| Aspirin | 13 (4.3) | 11 (5.1) | 0 (0) | 2 (7.4) | 0.275 |
| Clopidogrel | 2 (0.7) | 2 (0.9) | 0 (0) | 0 (0) | 0.843 |
| DAPT | 2 (0.7) | 2 (0.9) | 0 (0) | 0 (0) | 0.843 |
| Statin | 7 (2.3) | 7 (3.3) | 0 (0) | 0 (0) | 0.400 |
| Oral Hypoglycemic agents | 34 (11.3) | 27 (12.6) | 5 (8.2) | 2 (7.4) | 0.700 |
| **Interventions n (%)** |  |  |  |  |  |
| Carotid endarterectomy | 0 (0) | 0 (0) | 0 (0) | 0 (0) | NA |
| Carotid stenting | 0 (0) | 0 (0) | 0 (0) | 0 (0) | NA |
